# Supplementary material for: The puzzling mitochondrial phylogeography of the black soldier fly (Hermetia illucens), the commercially most important insect protein species
Source: BMC Evol Biol. 2020 May 24;20:60. doi: 10.1186/s12862-020-01627-2 (PMC7247124; doi:10.1186/s12862-020-01627-2)
Supplement: Supplementary file 2 — Additional file 2 : Supplementary Table S1. GenBank accession numbers for each distinct haplotype and locality/culture. Specimen repository indicated for pinned fly specimens (CSCA = California State Collection of Arthropods, USA; MZH = Finnish Museum of Natural History Luomus). [file 12862_2020_1627_MOESM2_ESM.xlsx]

## Sheet: Sheet1
Sequenced samples	Accession numbers EMBL / GenBank culture samples this study	Accession numbers EMBL / GenBank field-collected samples this study	Public database accession codes BOLD / EMBL / GenBank	Specimen repository (mostly pinned specimens)
AFRICA_Benin_ZRCBDP0086645		MT151287
AFRICA_La_Reunion_ZRCBDP0086646		MT151288		CSCA
AFRICA_Madagascar_MWH58,168		LR778154-55		CSCA
AFRICA_Zambia_MWH292		LR778156		CSCA
AFRICA_Kenya_MWKx17	LR792258			MZH
AFRICA_Kenya_Coastx3			BOLD (KDIPT731-11, KDIPT732-11, KDIPT733-11)
AFRICA_Kenya_MWK38		LR778157		MZH
AFRICA_South_Africa_Durban_ZRCBDP0081748		MT178507		ZRCBDP
AFRICA_South_Africa x16_fromRB	LR792265
AFRICA_South_Africa_x6 from RB	LR792266
AFRICA_South Africa_Kwazulu_Natal_ZRCBDP0086648		MT181121
AFRICA_South_Africa MWA188	LR792264
AFRICA_South_Africa MWAx40	LR792263
AFRICA_Ghana_Y2525		LR778158		CSCA
AFRICA_Malawi_MWH224		NS, partial.		CSCA
ASIA_Malaysia			JN869986
ASIA_Malaysia_Selegor_BOLD			BOLD (MBPT075-15)
ASIA_Malaysia_PetalingJaya_BOLD			BOLD (MetaG3)
ASIA_Malaysia_MWH65		LR792223		CSCA
ASIA_Malaysia_Kelantan_MYK3_ZRCBDP0080084	MT178502
ASIA_Bangladesh_Chittagongx15			BOLD (GMBCF5435-15)
ASIA_Pakistanx3_BOLD			BOLD (MADIP447-11; MADIP448-11; MADIP449-11)
ASIA_Pakistan_Azad_Kashmir			BOLD (MADIP052-10)
ASIA_Bhutan_MWH163		LR778159		CSCA
ASIA_Bhutan_MWH164		LR778160		CSCA
ASIA_India_Maharashtra			MG682545
ASIA_India_Bengaluru			KX230684
PALAEARCTIC_SouthKorea_Buyeo			FJ794358 ; FJ794365
PALAEARCTIC_SouthKorea_Koesan			HQ541236
PALAEARCTIC_SouthKorea_Bonghwa			FJ794378
PALAEARCTIC_SouthKorea_Gunsan			HQ541310
PALAEARCTIC_SouthKorea_Jangsu			HQ541300
PALAEARCTIC_SouthKorea_Iecheon			HQ541208
PALAEARCTIC_SouthKorea_Suwon			FJ794401 (identical to FLYtree52_KC192965)
PALAEARCTIC_SouthKorea_Pyeongtaek			HQ541320
ASIA_Indonesia_MY4_ZRCBDP0079514	MT178497
ASIA_China_Guangzhou_China5_ZRCBDP0080029	MT178498
ASIA_China_Shanghai_SHANGHAI3_ZRCBDP0081785	MT178511
ASIA_China_SichuanSC01		JQ344949
ASIA_Thailand_NongNoochNN6_25Jan2017_ZRCBDP0080098		MT178504
ASIA_Thailand_NongNooch_25Jan2017_ZRCBDP0080101		MT178505
ASIA_Thailand_Raitong_RT4_ZRCBDP0080116	MT178506
ASIA_Thailand_Krabi_MWH289		LR778161		CSCA
ASIA_Thailand_Surat_Thani_MWH367		LR778162		CSCA
ASIA_Vietnam_MWH66		LR792224		CSCA
ASIA_Vietnam_21Feb2017_ZRCBDP0080089	MT178503
ASIA_Singapore_CERSG6_12Mar2017_ZRCBDP0081767		MT178509
ASIA_Singapore30189b_09Oct2013_ZRCBDP0079426		MT186669
ASIA_Singapore30189aA01_001_09Oct2013_ZRCBDP0079425		MT178484
ASIA_Singapore_Semakau_29639_20Dec2012_ZRCBDP0079427		MT178485
ASIA_Singapore30093_15Aug2013_ZRCBDP0079433		MT178486
ASIA_Singapore_BSFx4_ZRCBDP0079435	MT178487
ASIA_Singapore_Yishun_YS22_21Feb2017_ZRCBDP0080074		MT178501
AUSTRALIA_OConner_ZRCBDP0081781		MT178510
AUSTRALIA_Perth_PERTH2_13Feb2017_ZRCBDP0080036	MT178499
AUSTRALIA_Goterra_fyshuride_ACT_ZRCBDP0081759		MT178508
AUSTRALIA_MacleayIsland_MI3_ZRCBDP0080051		MT178500
AUSTRALIA_Beaumont_Hills MWE249,253,263,307	LR792256			MZH (larvae)
AUSTRALIA_Beaumont_Hills MWEx24	LR792256			MZH (larvae)
AUSTRALIA_Perth MWE294	LR792254			MZH (larvae)
AUSTRALIA_Perth MWEx29	LR792253			MZH (larvae)
AUSTRALIA_Wyoming MWEx32	LR792257			MZH (larvae)
AUSTRALIA_Queenslandx4			BOLD (gvc09640-1L; gvc09641-1L;gvc9785-1L ; gvc9569-1L)
AUSTRALIA_Queenslandx3			BOLD (gvc10384-1L ; gvc09655-1L ; gvc9683-1L)
AUSTRALIA_Queensland_Polly_Creek_MWH363		LR792225		CSCA
AUSTRALIA_MWH68		LR792227		CSCA
AUSTRALIA_AmericanSamoa_MWH63		LR792226
AUSTRALIA_French_Polynesia			KX053394
AUSTRALIA_French_Polynesia_Moorea_Island			KX053393
AUSTRALIA_PapuaNewGuinea_Mandangx2			JN308284 ; JN308286
AUSTRALIA_PapuaNewGuinea_Mandangx6			JN308280 ; JN308281 ; JN308282 ; JN308283 ; JN308285 ; JN308287
EUROPE_Russia			KY8171150
EUROPE_Spain MWB&MWCx57	LR792260			MZH
EUROPE_Poland_HiproMine_POLANDx5_ZRCBDP0081794	MT178512
EUROPE_France_Languedoc_Roussillon			BOLD (GMMSP025-18)
EUROPE_France_NextAlim_A FRANC7x9_ZRCBDP0079481	MT178493
EUROPE_France_Sele_B FRANBx7_ZRCBDP0079490	MT178494
EUROPE_France_Avigenon_x8 ZRCBDP0079495	MT178495
EUROPE_Italy_A_InsuriaUniversity_x7_ZRCBDP0079502	MT178496
EUROPE_Italy_B_strainRI_004			LR585074
EUROPE_Portugalx3			MN868766; MN868787; MN868749
EUROPE_Portugal_Braga_Barcelos			MN868751
EUROPE_Switzerland MWDx26	LR792261
EUROPE_Switzerland MWDx18	LR792262
EUROPE_Switzerland_CH-4_2019		LR778207
NEARCTIC_Canada_Alberta			KM928149
NEARCTIC_UnitedStates_Oklahoma			HM381282
NEARCTIC_USA_LA_Cali_ZRCBDP0079457		MT181123
NEARCTIC_USA_Texas_x7 ZRCBDP0079461	MT178490
NEARCTIC_USA_LA_CaliforniaUSA7_9Aug2014_ZRCBDP0079468		MT178491
NEARCTIC_USA_SilverLake_LA_CaliforniaUSA8_31Jan2017_ZRCBDP0079469		MT178492
NEARCTIC_USA_KoreaTown_LA_ZRCBDP0079451		MT178488
NEARCTIC_CA01_USA_California_Sacramento		MT178458
NEARCTIC_CA02_USA_California_Sacramento		MT178459
NEARCTIC_CA04_USA_California_LA_ExpoParkx2		MT178460
NEARCTIC_CA06_USA_California_LA_ExpoParkx4		MT178461
NEARCTIC_CCA05_USA_California	MT178463
NEARCTIC_CCA04_USA_California_x2	MT178462
NEARCTIC_USA_Texas_B x8	LR792267
NEARCTIC_USA_KoreanTown_LA_Calix2_ZRCBDP0079453		MT181122
NEARCTIC_USA_Florida_MWH165		LR792228		CSCA
NEARCTIC_USA_Curham_MWH167		LR792229		CSCA
NEARCTIC_USA_Florida_BIOUG01787			BOLD (BIOUG01787)
NEOTROPICAL_Peru_Madre de Rios MWH166		LR792230
NEOTROPICAL_Peru_San Juan de Pamplona MWH220		LR792231		CSCA
NEOTROPICAL_Peru_San Juan de Pamplona MWH221		LR792232		CSCA
NEOTROPICAL_Peru_MZH_Y784		LR778212
NEOTROPICAL_Peru_MZH_Y785B		LR778213
NEOTROPICAL_Guayana_MWH62		LR792234
NEOTROPICAL_Venezuela_MWH69		LR778211
NEOTROPICAL_Venezuela_MZH_Y539		LR778209
NEOTROPICAL_Venezuela_MZH_Y573		LR778210
NEOTROPICAL_Panama_Chiriquiprovince_MWH222		LR792233		CSCA
NEOTROPICAL_Mexico-1_2019		LR778208
NEOTROPICAL_Brazil_MWH336		LR792235		CSCA
NEOTROPICAL_Brazil-2_2019		LR778205
NEOTROPICAL_Brazil-4_2019		LR778206
NEOTROPICAL_Brazil_Sao_Paolo_Ribeirao_Preto_MWH361		LR792236		CSCA
NEOTROPICAL_Brazil_Sao_Paolo_Ribeirao_Preto_MWH362		LR792237		CSCA
NEOTROPICAL_Colombia_2019_1		LR778204
NEOTROPICAL_Bolivia_MWH61		LR792238		CSCA
NEOTROPICAL_Bolivia_2019_1_4		LR778203
NEOTROPICAL_Bolivia_2019_5		LR778195
NEOTROPICAL_Bolivia_2019_6		LR778202
NEOTROPICAL_Bolivia_2019_7		LR778197
NEOTROPICAL_Bolivia_2019_8+14+15		LR778193
NEOTROPICAL_Bolivia_2019_10		LR778198
NEOTROPICAL_Bolivia_2019_11		LR778199
NEOTROPICAL_Bolivia_2019_12		LR778196
NEOTROPICAL_Bolivia_2019_16		LR778194
NEOTROPICAL_Bolivia_2019_17		LR778192
NEOTROPICAL_Bolivia_2019_18		LR778201
NEOTROPICAL_Bolivia_2019_20		LR778200
NEOTROPICAL_Paraguay_Amambay_MWH364		LR792239		CSCA
NEOTROPICAL_Paraguay_Amambay_MWH365		LR792240		CSCA
NEOTROPICAL_Paraguay_Amambay_MWH366		LR792241		CSCA
	238 sequences (16 barcodes) Singapore	21 Singapore	49 sequences BOLD + GB
	276 sequences (14 barcodes) Helsinki	54 Helsinki
Total	514	75	49
