# Supplementary material for: The puzzling mitochondrial phylogeography of the black soldier fly (Hermetia illucens), the commercially most important insect protein species
Source: BMC Evol Biol. 2020 May 24;20:60. doi: 10.1186/s12862-020-01627-2 (PMC7247124; doi:10.1186/s12862-020-01627-2)
Supplement: Supplementary file 3 — Additional file 3 : Supplementary Table S2. List of haplotypes. [file 12862_2020_1627_MOESM3_ESM.xlsx]

## Sheet: nn
Barcode sequence	Abbrevation	Biogeogr. region	Wild HT's	Culture HT's
China_Shanghai_ZRCBDP0081785_CC	CHS	EAST_PALEARCTIC		Hap_1
Vietnam_ZRCBDP0080089_CC	VT	ORIENTAL		Hap_1
Singapore_ZRCBDP0079435x4_CC	SIN_4	ORIENTAL		Hap_2
Australia_Wyoming_MWEx24_CC	AW_24	AUSTRALASIA		Hap_3
Australia_Perth_MWE294_CC	AP	AUSTRALASIA		Hap_4
Australia_Beaumont_Hills_MWE253x4_CC	ABH_4	AUSTRALASIA		Hap_4
Australia_Beaumont_Hills_MWEx20_CC	ABH_20	AUSTRALASIA		Hap_3
Australia_Perth_MWEx21_CC	AP_21	AUSTRALASIA		Hap_3
USA_California_CCA04x2_CC	USAC_2	NEARCTIC		Hap_5
USA_California_CCA05_CC	USAC	NEARCTIC		Hap_6
USA_Texas_x8_CC	USAT_8	NEARCTIC		Hap_1
USA_Texas_ZRCBDP0079461_CC	USAT	NEARCTIC		Hap_1
Kenya_Nairobi_MWKx17_CC	KN_17	AFROTROPICAL		Hap_1
South_Africa_MWAx37_CC	SACT_37	AFROTROPICAL		Hap_1
South_Africa_x16_CC	SAD_14	AFROTROPICAL		Hap_1
South_Africa_x6_CC	SAD_6	AFROTROPICAL		Hap_1
Kenya_N	KN_N	AFROTROPICAL		Hap_6
South_Africa_MWA188_CC	SACT	AFROTROPICAL		Hap_7
Poland_HiproMine_ZRCBDP0081794_CC	POL	PALEARCTIC		Hap_8
Italy B_CC	IT_B	PALEARCTIC		Hap_3
Switzerland_MWDx18_CC	SW_18	PALEARCTIC		Hap_9
Switzerland_MWDx24_CC	SW_24	PALEARCTIC		Hap_10
Spain_Alicante_MWBx55_CC	SP_55	PALEARCTIC		Hap_1
France_ZRCBDP0079481_NextAlim_CC	FR	PALEARCTIC		Hap_1
France_Sele_ZRCBDP0079490_CC	FRS	PALEARCTIC		Hap_1
Avigenon_ZRCBDP0079495_CC	FRA	PALEARCTIC		Hap_1
Italy_InsuriaUniv_ZRCBDP0079502_CC	IT	PALEARCTIC		Hap_8
China_Guangzhou_ZRCBDP0080029_CC	CHG	EAST_PALEARCTIC		Hap_1
Indonesia_MY4_ZRCBDP0079514	1	ORIENTAL	Hap_1
Vietnam_MWH66	2	ORIENTAL	Hap_2
Thailand_NongNooch6_ZRCBDP0080098	3	ORIENTAL	Hap_3
Thailand_NongNooch_ZRCBDP0080101	4	ORIENTAL	Hap_3
Thailand_Raitong_RT4_ZRCBDP0080116	5	ORIENTAL	Hap_3
Thailand_Krabi_MWH289	6	ORIENTAL	Hap_4
Thailand_Surat_Thani_MWH367	7	ORIENTAL	Hap_5
Singapore_Yishun_YS22_ZRCBDP0080074	8	ORIENTAL	Hap_2
Singapore_CERSG6_ZRCBDP0081767	9	ORIENTAL	Hap_3
Singapore_30189b_ZRCBD0079426	10	ORIENTAL	Hap_3
Singapore_30189a_ZRCBDP0079425	11	ORIENTAL	Hap_2
Singapore_Semakau_ZRCBDP0079427	12	ORIENTAL	Hap_3
Singapore_30093_ZRCBDP0079433	13	ORIENTAL	Hap_2
Bangladesh_x15_BOLD	14x15	ORIENTAL	Hap_2
FrenchPolynesia_MooreaIsl_BOLD	15	ORIENTAL	Hap_2
FrenchPolynesia_x2_KX053394_KX053393	16x2	ORIENTAL	Hap_2
Malaysia_Selegor_BOLD	17	ORIENTAL	Hap_2
Malaysia_Kelantan_MYK3_ZRCBDP0080084	18	ORIENTAL	Hap_6
Malaysia_MWH65	19	ORIENTAL	Hap_2
Malaysia_GB	20	ORIENTAL	NA
Malaysia_PetalingJaya_MetaG3_BOLD	21	ORIENTAL	Hap_2
American_Samoa_MWH63	22	ORIENTAL	Hap_3
PapuaNewGuinea_Madangx2	23x2	ORIENTAL	Hap_7
PapuaNewGuinea_Madangx6	24x6	ORIENTAL	Hap_2
India_Bengaluru_RO_BOLD	25	ORIENTAL	Hap_2
India_Maharashtra_BOLD	26	ORIENTAL	Hap_2
Bhutan_Wangudue_Phodrang_MWH163	27	ORIENTAL	Hap_3
Bhutan_Wangudue_Phodrang_MWH164	28	ORIENTAL	Hap_1
South_Africa_Durban_x6_ZRCBDP0081748	29x6	AFROTROPICAL	Hap_8
Kwazulu_Natal	30	AFROTROPICAL	Hap_9
KenyaCoast_x3_BOLD	31x3	AFROTROPICAL	Hap_8
Kenya_MWH38	32	AFROTROPICAL	Hap_8
Zambia_Livingstone_MWH292	33	AFROTROPICAL	Hap_2
Benin	34	AFROTROPICAL	Hap_10
Ghana_Western_region_MZHY2525	35	AFROTROPICAL	Hap_10
Malawi_Senga_Bay_MWH224	36	AFROTROPICAL	NA
La_Reunion	37	AFROTROPICAL	Hap_2
Madagascar_x2_MWH58_MWH168	38x2	AFROTROPICAL	Hap_2
France_Languedoc_Roussillon_BOLD	39	PALEARCTIC	Hap_2
Russia_KY8171150	40	PALEARCTIC	Hap_1
Pakistan_x3_BOLD	41x3	PALEARCTIC	Hap_3
Pakistan_Azad_Kashmir_BOLD	42	PALEARCTIC	Hap_3
SouthKorea_Buyeo_FJ794358	43	PALEARCTIC	Hap_11
SouthKorea_Goesan_HQ541236	44	PALEARCTIC	Hap_12
SouthKorea_Bonghwa_FJ794378	45	PALEARCTIC	Hap_13
SouthKorea_Gunsan_HQ541310	46	PALEARCTIC	Hap_13
SouthKorea_Jangsu_HQ541300	47	PALEARCTIC	Hap_14
SouthKorea_Iecheon_HQ541208	48	PALEARCTIC	Hap_2
SouthKorea_Suwon_FJ794401	49	PALEARCTIC	Hap_15
SouthKorea_Pyeongtaek_HQ541320	50	PALEARCTIC	Hap_3
SouthKorea_Buyeo_FJ794365	51	PALEARCTIC	Hap_3
China_Sichuan_SC01	52	EAST_PALEARCTIC	Hap_1
Switzerland_CH4_2019	53	PALEARCTIC	Hap_2
Panama_Chiriqui_prov_MWH222	54	NEOTROPICAL	Hap_16
Guayana_MWH62	55	NEOTROPICAL	Hap_17
Colombia_2019	56	NEOTROPICAL	Hap_18
Peru_Madre_de_Dios_MWH166	57	NEOTROPICAL	Hap_19
Peru_San_Juan_dP_MWH220	58	NEOTROPICAL	Hap_20
Peru_San_Juan_dP_MWH221	59	NEOTROPICAL	Hap_21
Peru_MZH_Y784	60	NEOTROPICAL	Hap_22
Peru_MZH_Y785B	61	NEOTROPICAL	Hap_23
Venezuela_MWH69	62	NEOTROPICAL	Hap_24
Venezuela_Yaracuy_state_MZH_Y539	63	NEOTROPICAL	Hap_25
Venezuela_Maracay_MZH_Y573	64	NEOTROPICAL	NA
Brasil_MWH336	65	NEOTROPICAL	Hap_26
Brasil_2019_2	66	NEOTROPICAL	Hap_27
Brasil_2019_4	67	NEOTROPICAL	Hap_28
Brazil_SP_Rib_Perto_MWH361	68	NEOTROPICAL	Hap_29
Brazil_SP_Rib_Perto_MWH362	69	NEOTROPICAL	Hap_30
Bolivia_MWH61	70	NEOTROPICAL	Hap_31
Bolivia_2019_17	71	NEOTROPICAL	Hap_32
Bolivia_2019_8_14_15	72x3	NEOTROPICAL	Hap_33
Bolivia_2019_16	73	NEOTROPICAL	Hap_34
Bolivia_2019_5	74	NEOTROPICAL	Hap_2
Bolivia_2019_12	75	NEOTROPICAL	Hap_35
Bolivia_2019_7	76	NEOTROPICAL	Hap_36
Bolivia_2019_10	77	NEOTROPICAL	Hap_37
Bolivia_2019_11	78	NEOTROPICAL	Hap_38
Bolivia_2019_20	79	NEOTROPICAL	Hap_39
Bolivia_2019_18	80	NEOTROPICAL	Hap_40
Bolivia_2019_6	81	NEOTROPICAL	Hap_41
Bolivia_2019_4	82	NEOTROPICAL	Hap_42
Paraguay_Amambay_MWH364	83	NEOTROPICAL	Hap_43
Paraguay_Amambay_MWH365	84	NEOTROPICAL	Hap_44
Paraguay_Amambay_MWH366	85	NEOTROPICAL	Hap_45
Mexico_2019_1	86	NEOTROPICAL	Hap_46
USA_California_LA_KoreanTown_Cali_x2	87x2	NEARCTIC	Hap_47
USA_California_Sacramento_CA01	88	NEARCTIC	Hap_48
USA_California_Sacramento_CA02	89	NEARCTIC	Hap_47
USA_California_LA_EP_CA04	90	NEARCTIC	Hap_47
USA_California_LA_EP_CA05	91	NEARCTIC	Hap_15
USA_California_LA_EPx4_CA06	92x4	NEARCTIC	Hap_47
USA_California_LA_Cali_ZRCBDP00794577	93	NEARCTIC	Hap_48
USA_California_x8_ZRCBDP0079469	94x8	NEARCTIC	Hap_47
USA_California_ZRCBDP0079468	95	NEARCTIC	Hap_49
USA_California_ZRCBDP0079451	96	NEARCTIC	Hap_48
USA_Florida_MWH165	97	NEARCTIC	Hap_50
USA_Curham_MWH167	98	NEARCTIC	Hap_47
USA_Oklahoma_BOLD	99	NEARCTIC	Hap_8
USA_Florida_BIOUG01787_BOLD	100	NEARCTIC	Hap_8
Canada_Alberta_BOLD_BIOUG05089-F11	101	NEARCTIC	Hap_3
Australia_Queensland_x3_BOLD	102x3	AUSTRALASIA	Hap_2
Australia_Queensland_x4_BOLD	103x4	AUSTRALASIA	Hap_3
Australia_Queensland_MWH363	104	AUSTRALASIA	Hap_2
Australia_OConner_ZRCBDP0081781	105	AUSTRALASIA	Hap_2
Australia_Perth_ZRCBDP0080036	106	AUSTRALASIA	Hap_2
Australia_Goterra_ZRCBDP0081759	107	AUSTRALASIA	Hap_3
Australia_MacleayIsl_ZRCBDP0080051	108	AUSTRALASIA	Hap_2
Australia_MWH68	109	AUSTRALASIA	Hap_51
Portugal	110	PALEARCTIC	Hap_10
Portugalx3	111	PALEARCTIC	Hap_8
